# Supplementary material for: Jatrocurcadiones A and B: two novel diterpenoids with an unusual 10,11-seco-premyrsinane skeleton from Jatropha curcas
Source: Royal Society of Chemistry journal article supplement (doi:10.1039/c5ra11380f), 2015-01-01
Supplement: c5ra11380f1.pdf [file c5ra11380f1.pdf]

## Electronic Supplementary Information

Jatrocurcadienes A and B: two novel diterpenoids with an unusual 10,11-*seco*-premyrsinane skeleton from *Jatropha curcas*

Jing-Mei Bao,<sup>a</sup> Zhi-You Su,<sup>a</sup> Lan-Lan Lou,<sup>a</sup> Jian-Yong Zhu,<sup>a</sup> Gui-Hua Tang,<sup>a</sup> Li-She Gan,<sup>b</sup> Xian-Zhang Bu,<sup>a</sup> Sheng Yin<sup>\*a</sup>

<sup>a</sup> School of Pharmaceutical Sciences, Sun Yat-sen University, Guangzhou, Guangdong 510006, P. R. China. E-mail: yinsh2@mail.sysu.edu.cn; Fax: +86-20-39943090; Tel: +86-20-39943090.

<sup>b</sup> College of Pharmaceutical Sciences, Zhejiang University, Hangzhou, Zhejiang 310058, P. R. China.

## TABLE OF CONTENTS

- S1. General Experimental Procedures**
- S2. Plant Material**
- S3. Extraction and Isolation**
- S4. Chemical Correlation of 1 to 2**
- S5. Evaluation of the TrxR inhibitory activities**
- S6. OR, UV, ECD, IR, and MS data of 1 and 2**
- S7.  $^1\text{H}$  NMR spectrum of 1 in Pyridine- $d_5$**
- S8.  $^{13}\text{C}$  NMR spectrum of 1 in Pyridine- $d_5$**
- S9.  $^1\text{H}$ - $^1\text{H}$  COSY spectrum of 1 in Pyridine- $d_5$**
- S10. HSQC spectrum of 1 in Pyridine- $d_5$**
- S11. HMBC spectrum of 1 in Pyridine- $d_5$**
- S12. NOESY spectrum of 1 in Pyridine- $d_5$**
- S13.  $^1\text{H}$  NMR spectrum of 1 in  $\text{CDCl}_3$**
- S14.  $^{13}\text{C}$  NMR spectrum of 1 in  $\text{CDCl}_3$**
- S15. HSQC spectrum of 1 in  $\text{CDCl}_3$**
- S16. HRESIMS spectrum of 1**
- S17. IR spectrum of 1**
- S18.  $^1\text{H}$  NMR spectrum of 2 in Pyridine- $d_5$**
- S19. HSQC spectrum of 2 in Pyridine- $d_5$**
- S20. HMBC spectrum of 2 in Pyridine- $d_5$**
- S21. HRESIMS spectrum of 2**
- S22. IR spectrum of 2**
- S23. The quantum chemical calculations**

## S1. General Experimental Procedures

Optical rotations were measured on a Rudolph Autopol I automatic polarimeter, and ECD spectra were obtained on an Applied Photophysics Chirascan spectrometer. UV spectra were recorded on a Shimadzu UV-2450 spectrophotometer. IR spectra were determined on FT-IR Equinox 55 and Bruker Tensor37 infrared spectrophotometers. NMR spectra were measured on Bruker AM-400 and Avance III-600 spectrometers at 25°C. ESIMS was measured on a Finnigan LCQ Deca instrument, and HRESIMS was performed on a Waters Micromass Q-TOF spectrometer. A Shimadzu LC-20 AT equipped with a SPD-M20A PDA detector was used for HPLC. A YMC-pack ODS-A column (250 × 10 mm, S-5 μm, 12 nm) was used for semi-preparative HPLC separation. Silica gel (300–400 mesh, Qingdao Haiyang Chemical Co., Ltd.), C<sub>18</sub> reversed-phase silica gel (12 nm, S-50 μm, YMC Co., Ltd.), Sephadex LH-20 gel (Amersham Biosciences), and MCI gel (CHP20P, 75–150 μm, Mitsubishi Chemical Industries Ltd.) were used for column chromatography (CC). All solvents used were of analytical grade (Guangzhou Chemical Reagents Company, Ltd.). TrxR was purchased from Sigma-Aldrich (St. Louis, USA).

## S2. Plant Material

The twigs of *J. curcas* were collected in July 2014 in the Yunnan Province, P. R. China, and were authenticated by Prof. You-Kai Xu of Xishuangbanna Tropical Botanical Garden, Chinese Academy of Sciences. A voucher specimen (accession number: MFS201407) has been deposited at the School of Pharmaceutical Sciences, Sun Yat-sen University.

## S3. Extraction and Isolation

The air-dried powder of the twigs of *J. curcas* (5 kg) was extracted with 95% EtOH (3 × 8 L) at room temperature to give 150 g of crude extract. The extract was suspended in H<sub>2</sub>O (1.5 L) and successively partitioned with petroleum ether (PE, 3 × 2 L), EtOAc (3 × 2 L), and *n*-BuOH (3 × 2 L). The EtOAc extract (39 g) was subjected to MCI gel (CC) eluted with a MeOH/H<sub>2</sub>O gradient (3:7 → 10:0) to afford five fractions (I–V). Fraction III (6 g) was chromatographed over C<sub>18</sub> reversed-phase (RP-18) silica gel CC eluted with MeOH/H<sub>2</sub>O (4:6 → 10:0) to afford five fractions (IIIa–IIIe). Fraction IIIc was subjected to Sephadex LH-20 gel to give three fractions (IIIc1–IIIc3). Fraction IIIc1 was further purified on a semi-preparative reversed-phase (RP) HPLC system equipped with a YMC column (MeOH/H<sub>2</sub>O, 7:3, 3 mL/min), to give **1** (10.6 mg, *t<sub>R</sub>* 16.5 min). Fraction IIIe was subjected to silica gel CC (PE/CH<sub>2</sub>Cl<sub>2</sub>, 2:1 → 1:2) to give four fractions (IIIe1–IIIe4). Fraction IIIe2 was purified using RP-HPLC (CH<sub>3</sub>OH/H<sub>2</sub>O, 8:2, 3 mL/min), to give **2** (0.6 mg, *t<sub>R</sub>* 15.6 min).

## S4. Chemical Correlation of **1** to **2**

Acetic anhydride (10 μL) was added to a stirred solution of compound **1** (1 mg) in freshly distilled pyridine (1 mL). After 12 h at rt, water (1 mL) was added and the mixture was extracted with ethyl acetate (3 × 1 mL). The combined organic solvents were evaporated and the residue was purified by RP-HPLC (CH<sub>3</sub>OH/H<sub>2</sub>O, 8:2, 3 mL/min) to yield **2** (0.52 mg), which was identified by the <sup>1</sup>H NMR spectrum, MS data and specific rotation.

### S5. Evaluation of the TrxR inhibitory activities

For determining the TrxR inhibitory activity of the compounds, the DTNB reduction assay was employed. All assays were conducted at 25 °C in a total volume of 40  $\mu\text{L}$ . In each measurement, 0.3  $\mu\text{L}$  of TrxR (0.04  $\mu\text{M}$ ) was added to an assay buffer containing 1 M potassium phosphate (pH 7.0), 500 mM EDTA (pH 7.4), NADPH (0.48 mM) and 1  $\mu\text{L}$  of inhibitor at various concentrations. After 5 min pre-incubation, the reaction was initiated with the addition of 3.2  $\mu\text{L}$  of DTNB (final concentration of 5.0 mM). The control was incubated with the same amount of DMSO (2.5%, v/v). The increase in absorbance at 412 nm ( $\Delta\epsilon_{412} = 13.6 \text{ mM}^{-1} \text{ cm}^{-1}$ ) was monitored in the initial 120 s. The  $\text{IC}_{50}$  values were calculated to represent the TrxR inhibitory effect of compounds.

**Table S1.** The TrxR inhibitory activity of some compounds ( $\text{IC}_{50}$ ,  $\mu\text{M}$ )

| compound              | $\text{IC}_{50}$ ( $\mu\text{M}$ ) <sup>a</sup> |
|-----------------------|-------------------------------------------------|
| <b>1</b>              | $10.0 \pm 2.6$                                  |
| curcumin <sup>b</sup> | $25.0 \pm 2.2$                                  |

<sup>a</sup>Values are represented as means  $\pm$  SD based on three independent experiments.

<sup>b</sup>Positive control.

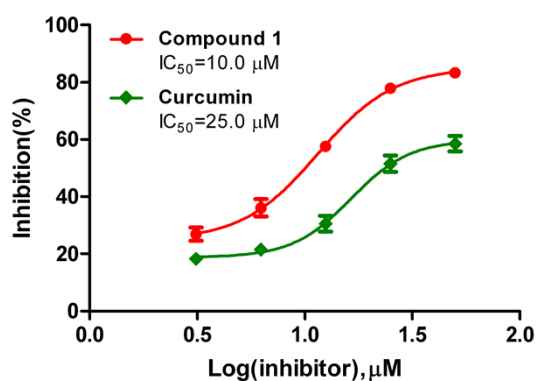

**Fig. S1** Inhibition curves of compounds **1** and curcumin (positive control) against TrxR.

## S6. OR, UV, ECD, IR, and MS data of 1 and 2

Jatrocurcadione A (**1**): yellow oil;  $[\alpha]_D^{20} +268.8$  ( $c$  0.54,  $\text{CH}_2\text{Cl}_2$ ); UV ( $\text{CH}_3\text{CN}$ )  $\lambda_{\text{max}}$  ( $\log \epsilon$ ) 355 (2.21), 248 (3.60), 197 (3.67); ECD ( $c$   $3.31 \times 10^{-3}$  M,  $\text{CH}_3\text{CN}$ )  $\lambda_{\text{max}}$  ( $\Delta\epsilon$ ) 341 (1.27), 278 (0.21), 251 (-0.59), 229 (0.73), 204 (-1.13) nm; IR (microscope)  $\nu_{\text{max}}$  3441, 2963, 1713, 1587, 1456, 1374, 1259, 1209, 1040, 889, and 738  $\text{cm}^{-1}$ ;  $^1\text{H}$  and  $^{13}\text{C}$  NMR data recorded in Pyridine- $d_5$ , see **Table 1**;  $^1\text{H}$  NMR ( $\text{CDCl}_3$ , 400 MHz)  $\delta_{\text{H}}$  6.36 (1H, s, H-11), 4.81 (1H, dd,  $J = 2.6, 2.6$  Hz, H-1), 2.52 (1H, m, H-5a), 2.45 (1H, overlap, H-2), 2.45 (1H, overlap, H-5b), 2.45 (1H, overlap, H-10), 2.25 (1H, m, H-8a), 2.17 (1H, m, H-8b), 2.05 (3H, s, H<sub>3</sub>-20), 1.69 (2H, m, H<sub>2</sub>-7), 1.29 (3H, d,  $J = 7.5$  Hz, H<sub>3</sub>-16), 1.10 (6H, br d,  $J = 6.3$  Hz, H<sub>3</sub>-18 and H<sub>3</sub>-19), 0.97 (3H, s, H<sub>3</sub>-17);  $^{13}\text{C}$  NMR ( $\text{CDCl}_3$ , 100 MHz)  $\delta_{\text{C}}$  208.6 (C, C-3), 191.9 (C, C-14), 158.9 (C, C-9), 158.6 (C, C-15), 155.0 (C, C-12), 143.6 (C, C-4), 131.8 (C, C-13), 120.9 (CH, C-11), 76.4 (CH, C-1), 48.7 (CH, C-2), 39.4 ( $\text{CH}_2$ , C-7), 38.4 (C, C-6), 36.6 (CH, C-10), 35.6 ( $\text{CH}_2$ , C-5), 23.9 ( $\text{CH}_2$ , C-8), 21.6 ( $\text{CH}_3$ , C-17), 21.5 ( $\text{CH}_3$ , C-18), 21.0 ( $\text{CH}_3$ , C-19), 15.9 ( $\text{CH}_3$ , C-20), 13.4 ( $\text{CH}_3$ , C-16); positive ESIMS  $m/z$  315.2  $[\text{M} + \text{H}]^+$ ; HRESIMS  $m/z$  315.1964  $[\text{M} + \text{H}]^+$  (calcd 315.1955).

Jatrocurcadione B (**2**): light yellow oil;  $[\alpha]_D^{20} +143.3$  ( $c$  0.06,  $\text{CH}_2\text{Cl}_2$ ); UV ( $\text{CH}_3\text{CN}$ )  $\lambda_{\text{max}}$  ( $\log \epsilon$ ) 356 (3.45), 252 (3.69), 198 (4.01); ECD ( $c$   $2.92 \times 10^{-4}$  M,  $\text{CH}_3\text{CN}$ )  $\lambda_{\text{max}}$  ( $\Delta\epsilon$ ) 348 (2.99), 249 (-2.42), 225 (2.25), 193 (-13.35) nm; IR (KBr)  $\nu_{\text{max}}$  3123, 2921, 1796, 1600, 1374, 1229, 1142, and 878  $\text{cm}^{-1}$ ;  $^1\text{H}$  and  $^{13}\text{C}$  NMR data, see **Table 1**; HRESIMS  $m/z$  357.2050  $[\text{M} + \text{H}]^+$  (calcd 357.2060).

S7. <sup>1</sup>H NMR spectrum of 1 in Pyridine-d<sub>5</sub>

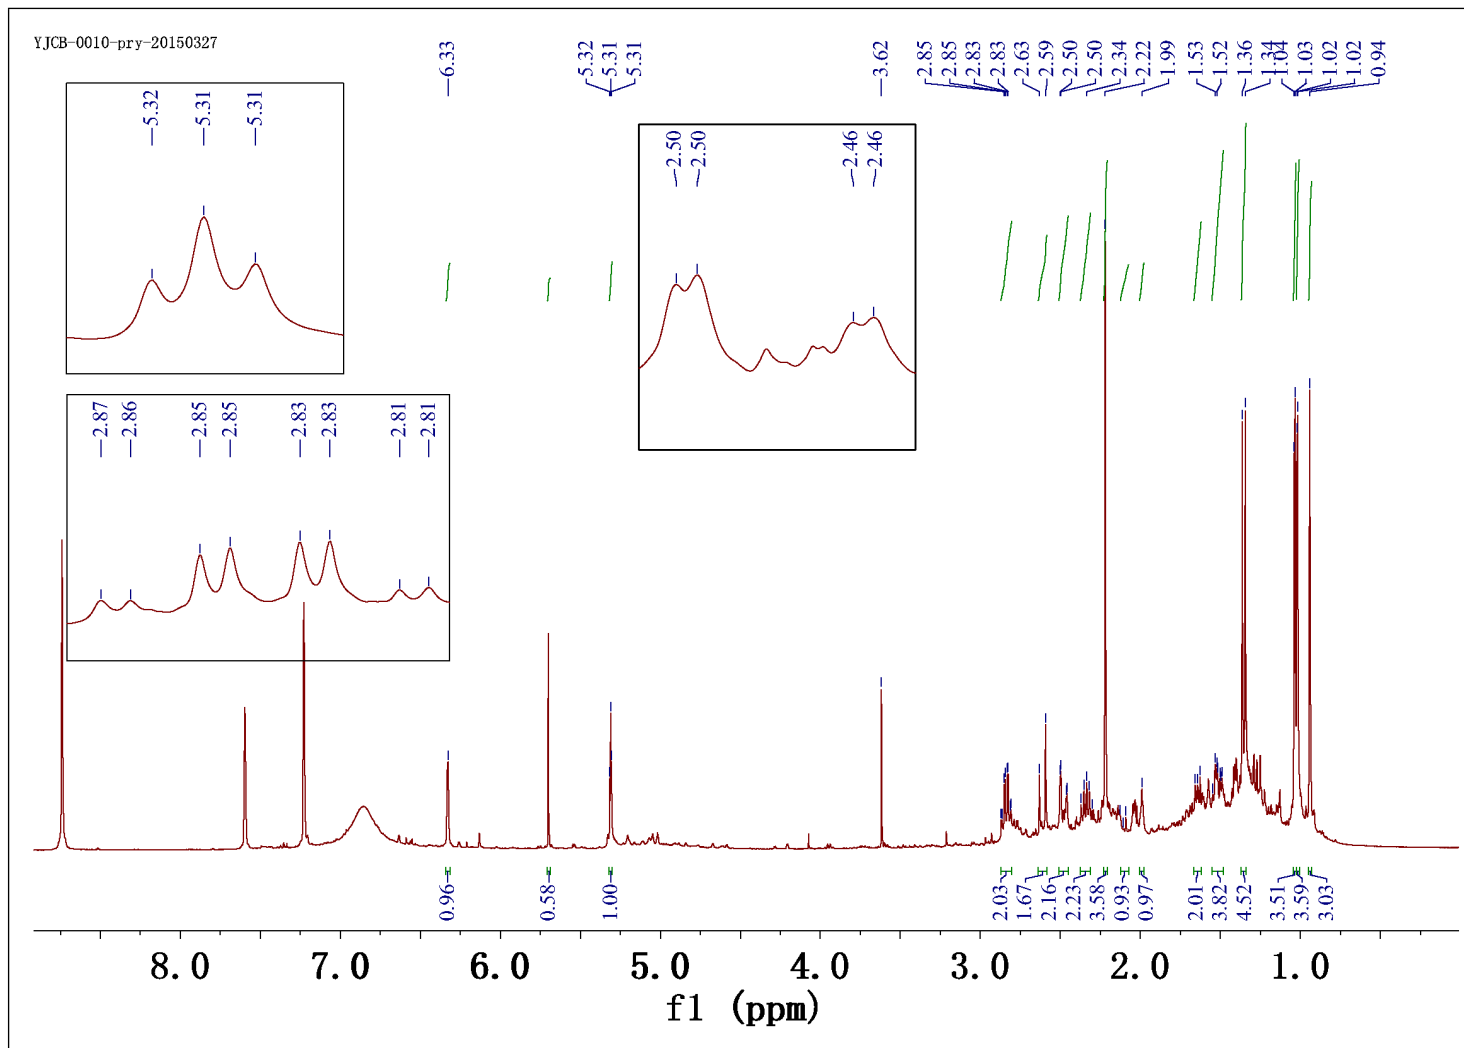

S8.  $^{13}\text{C}$  NMR spectrum of 1 in Pyridine- $d_5$

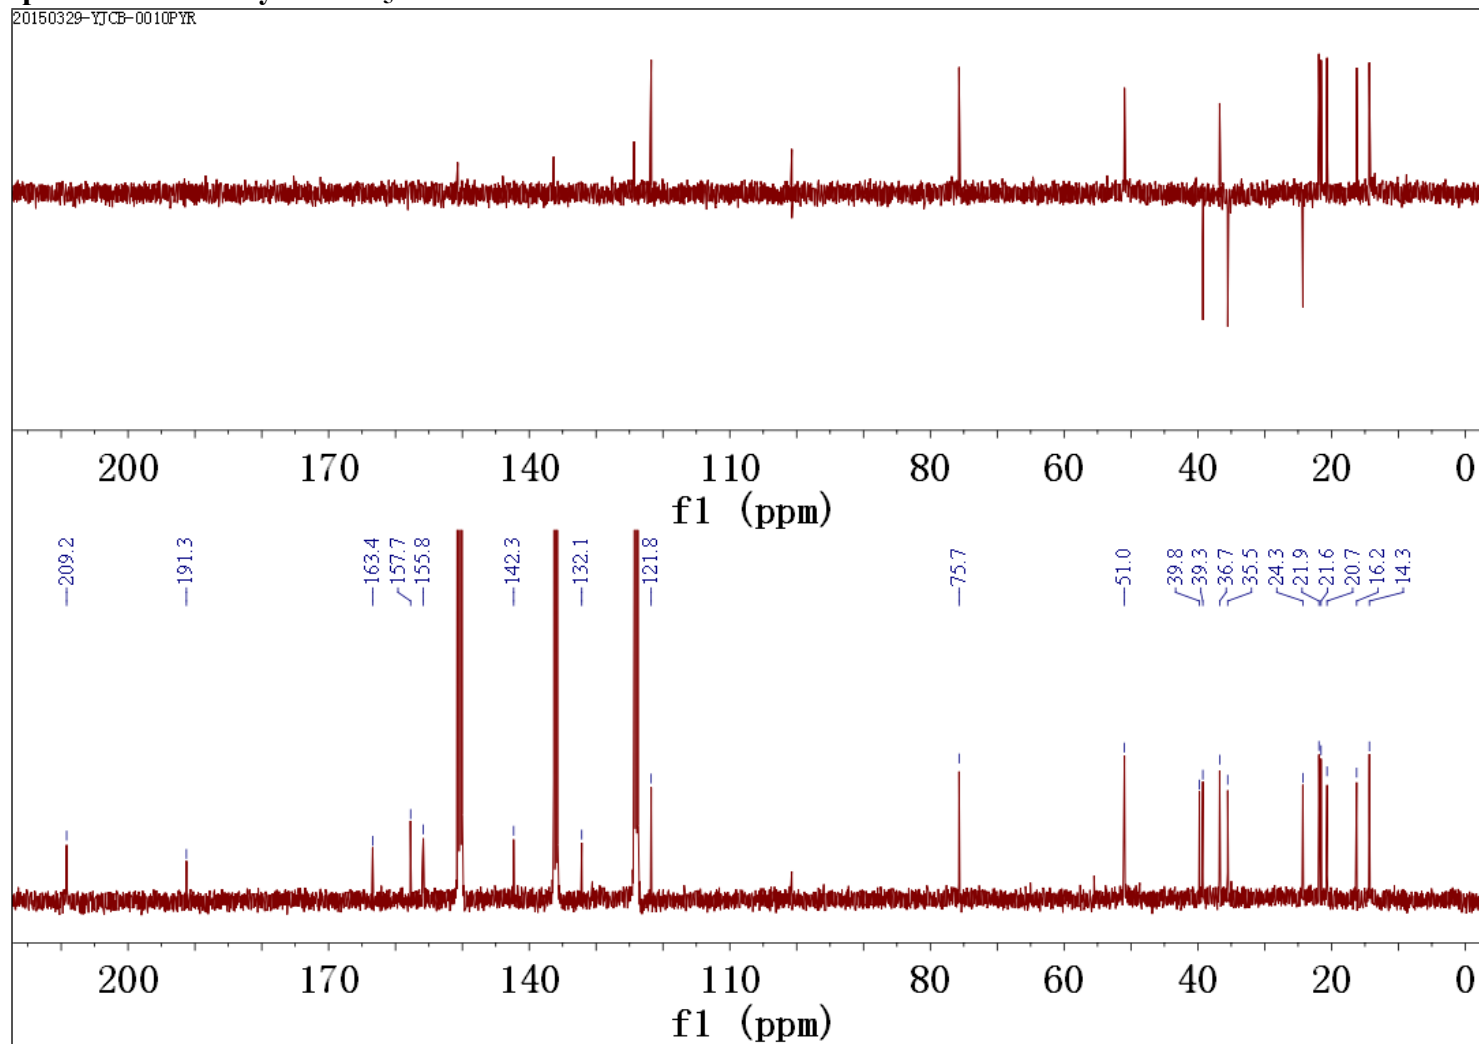



S9.  $^1\text{H}$ - $^1\text{H}$  COSY spectrum of 1 in Pyridine- $d_5$

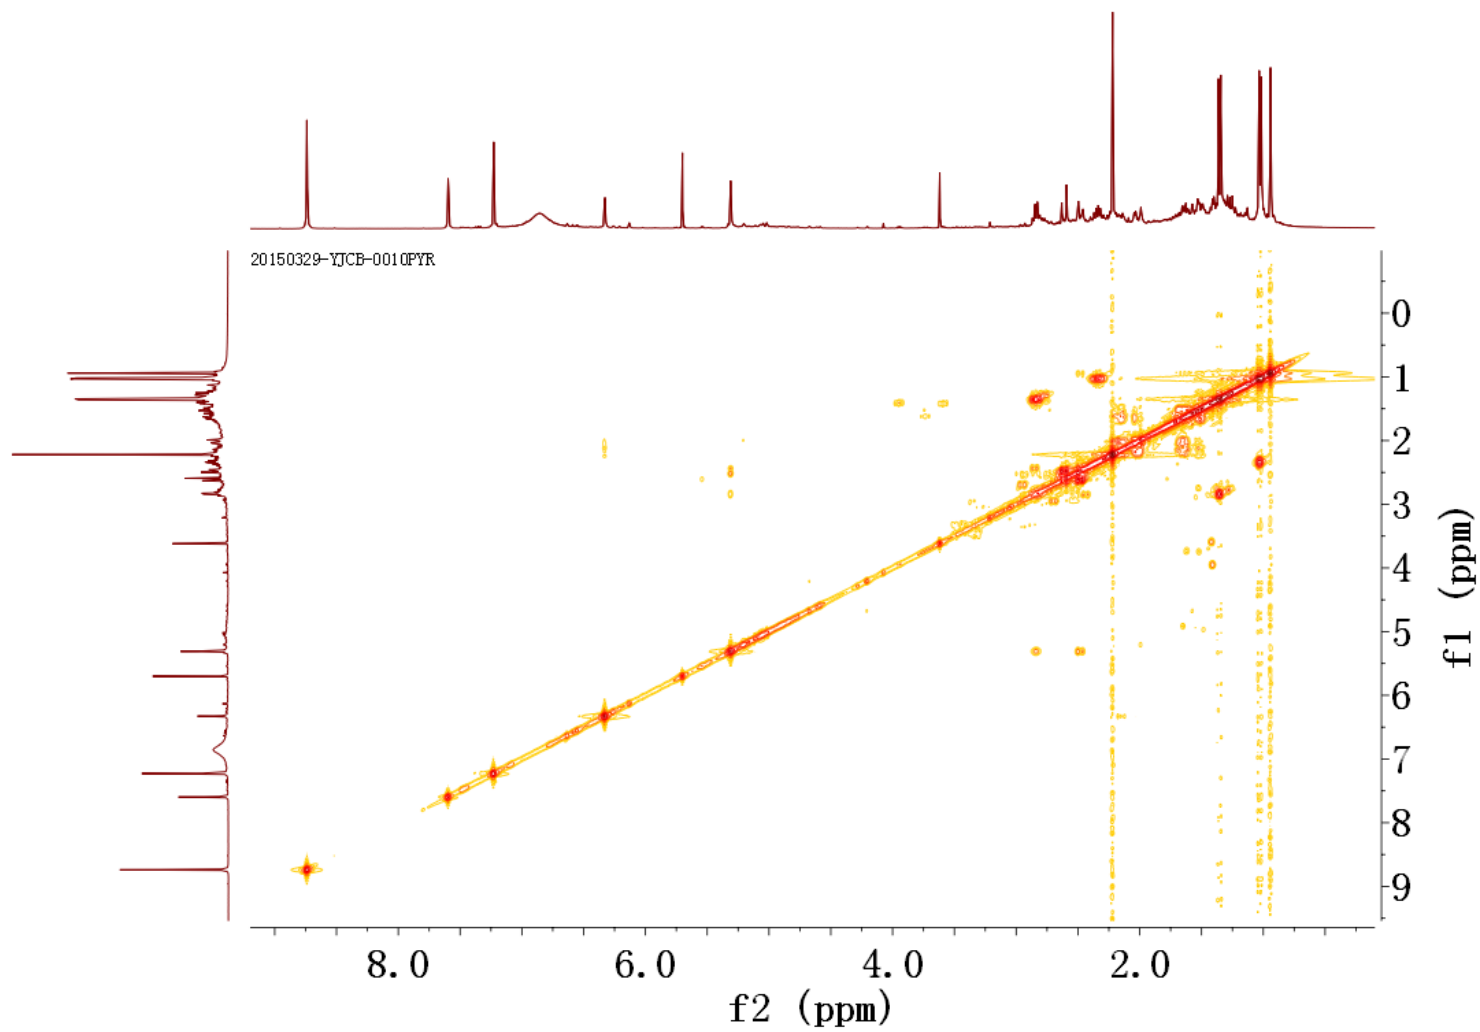

S10. HSQC spectrum of 1 in Pyridine-*d*<sub>5</sub>

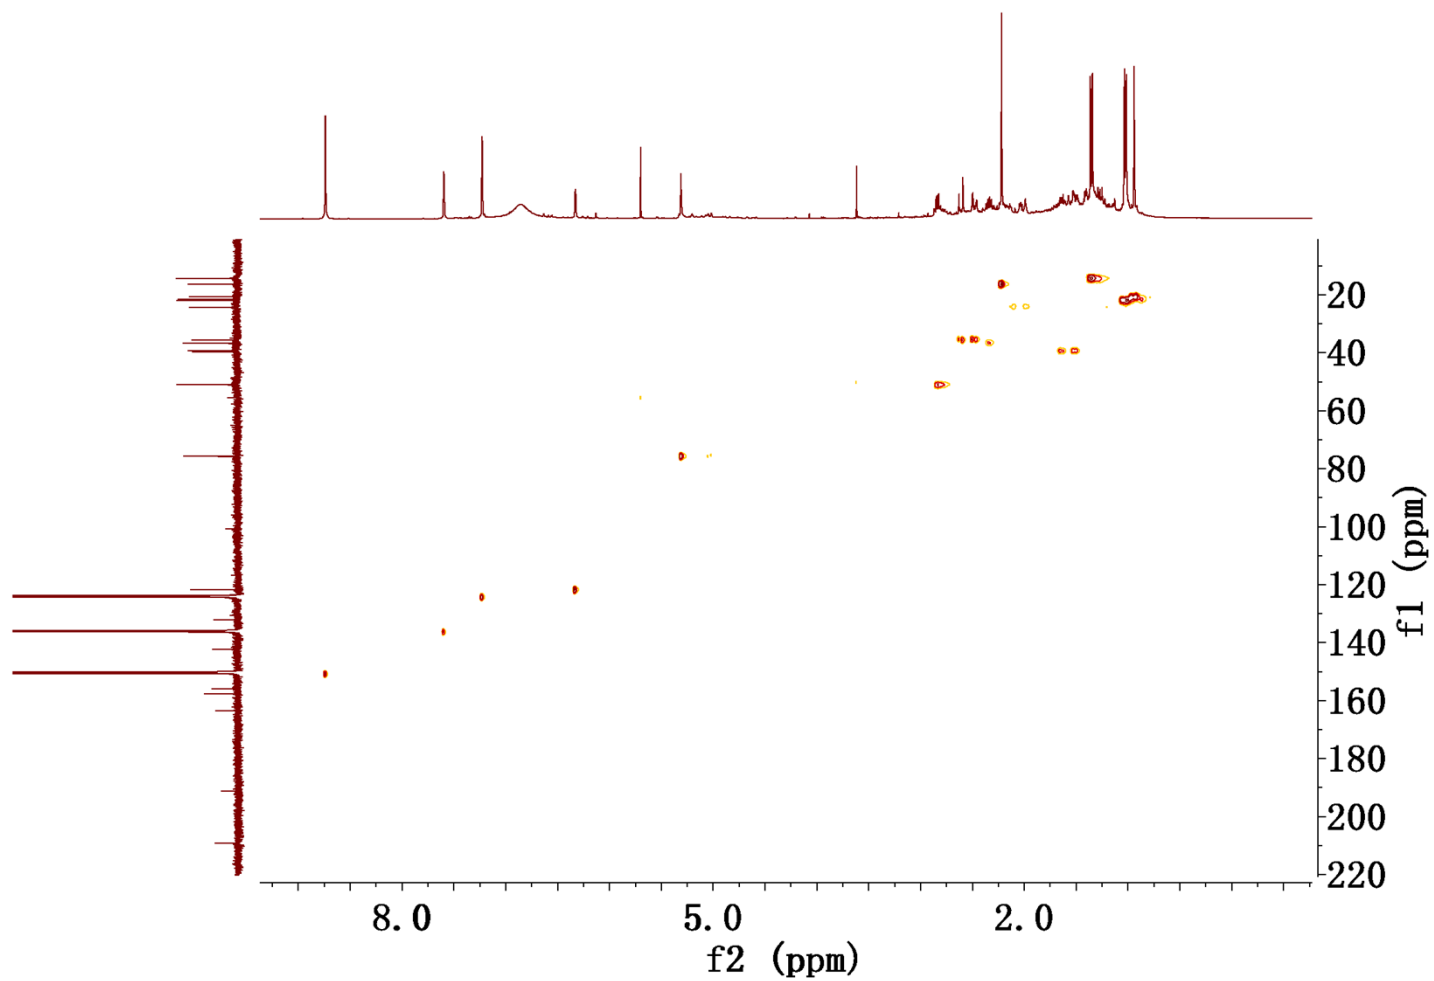

S11. HMBC spectrum of 1 in Pyridine-*d*<sub>5</sub>

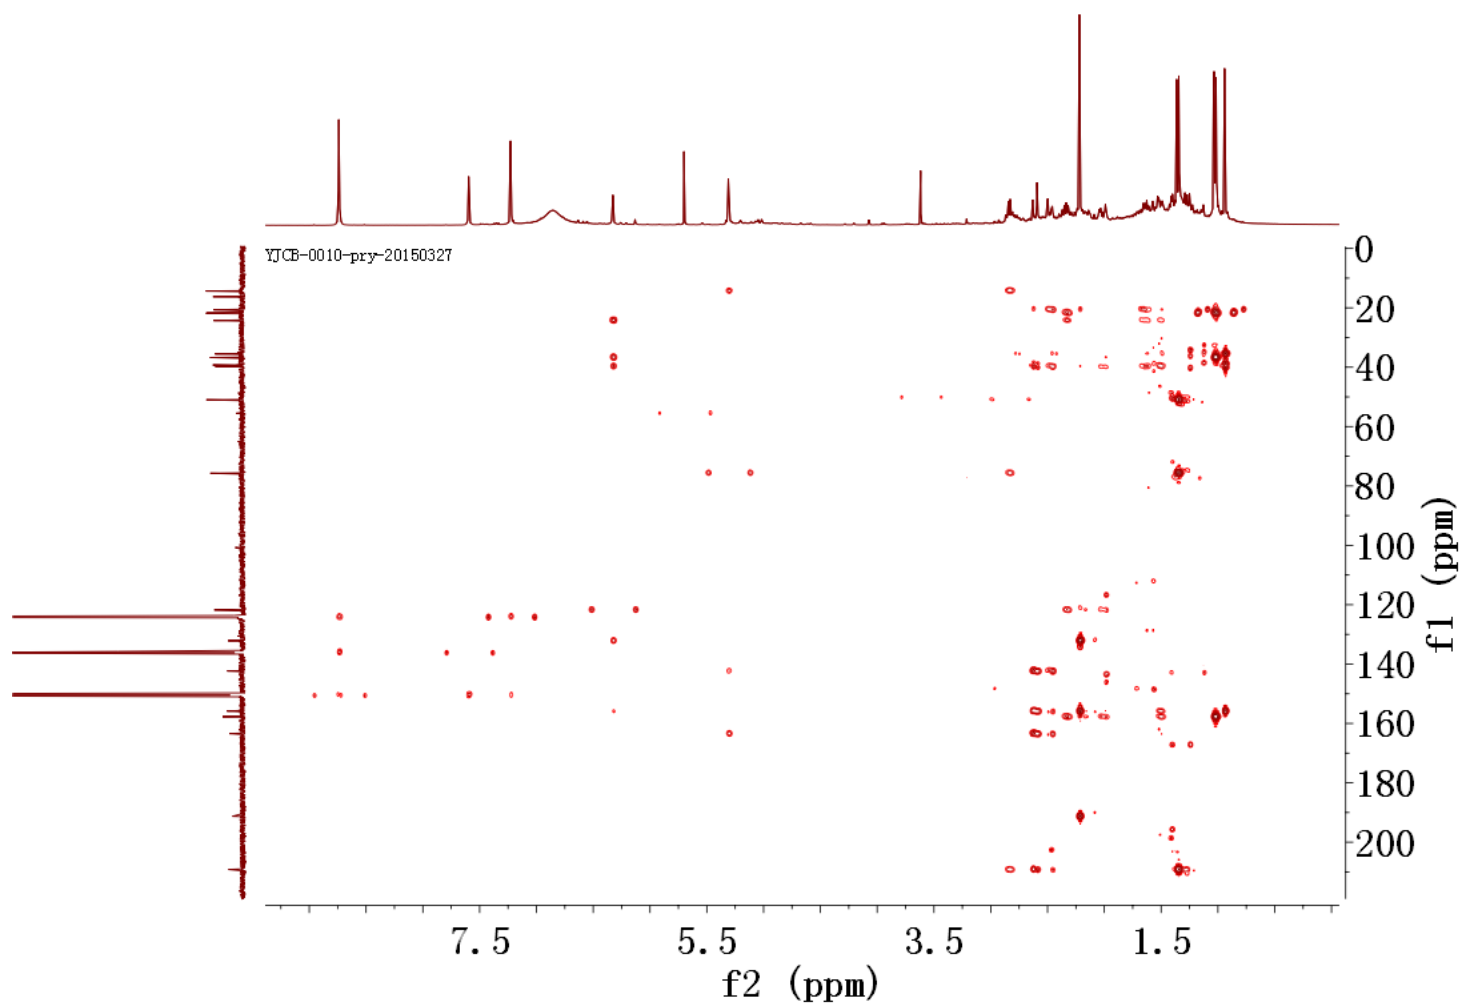

S12. NOESY spectrum of 1 in Pyridine- $d_5$

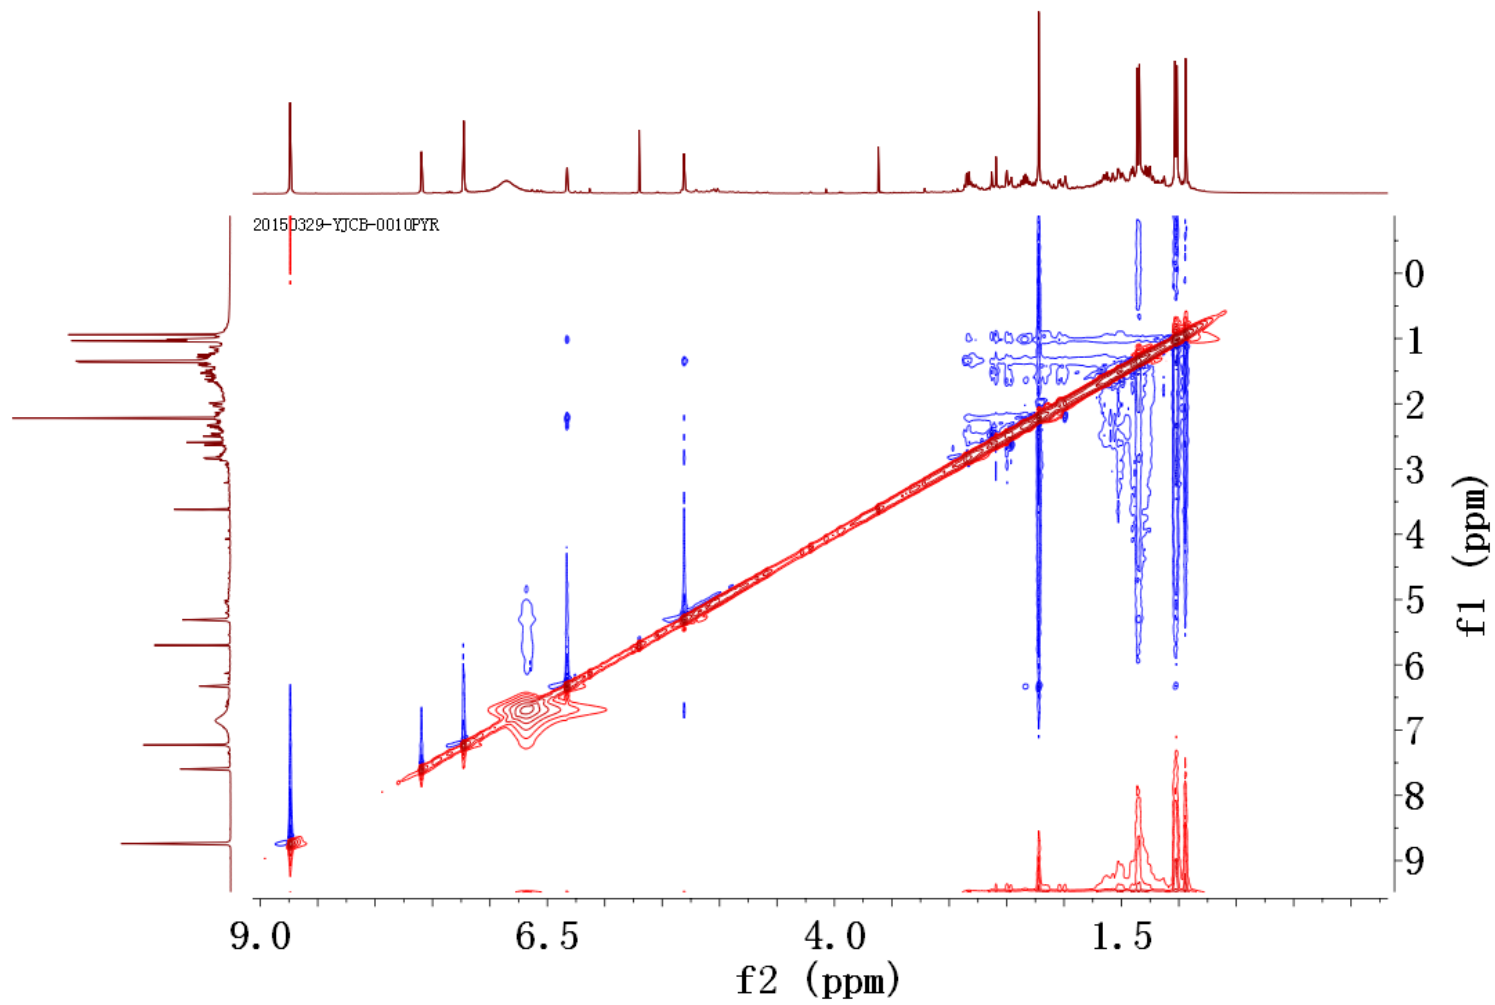

S13. <sup>1</sup>H NMR spectrum of 1 in CDCl<sub>3</sub>

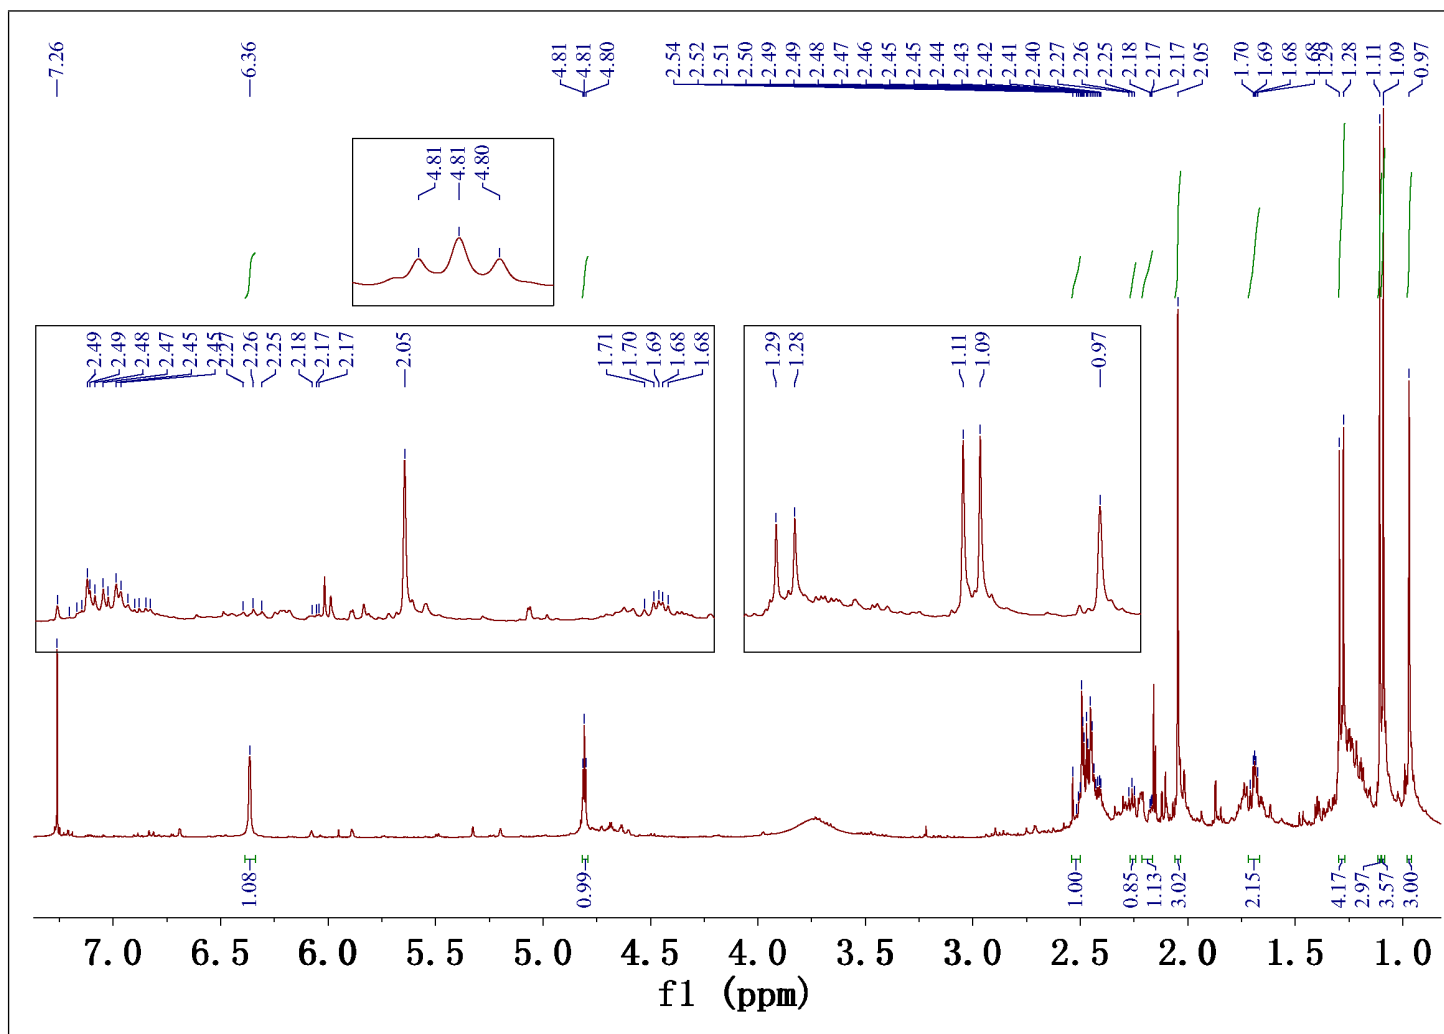

S14.  $^{13}\text{C}$  NMR spectrum of 1 in  $\text{CDCl}_3$

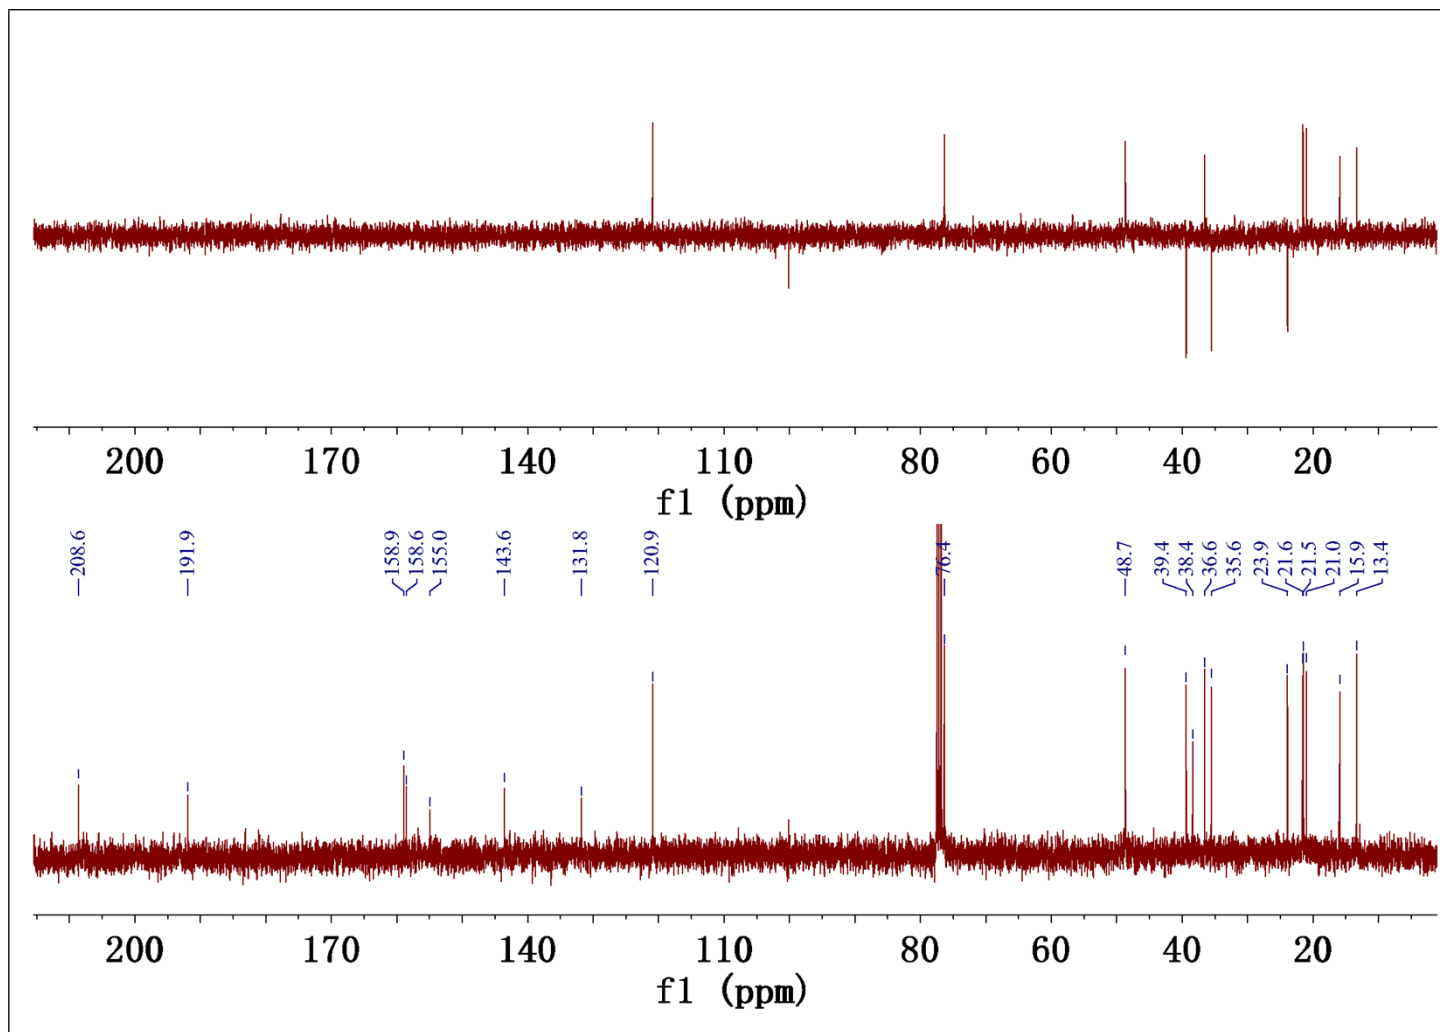

S15. HSQC spectrum of 1 in CDCl<sub>3</sub>

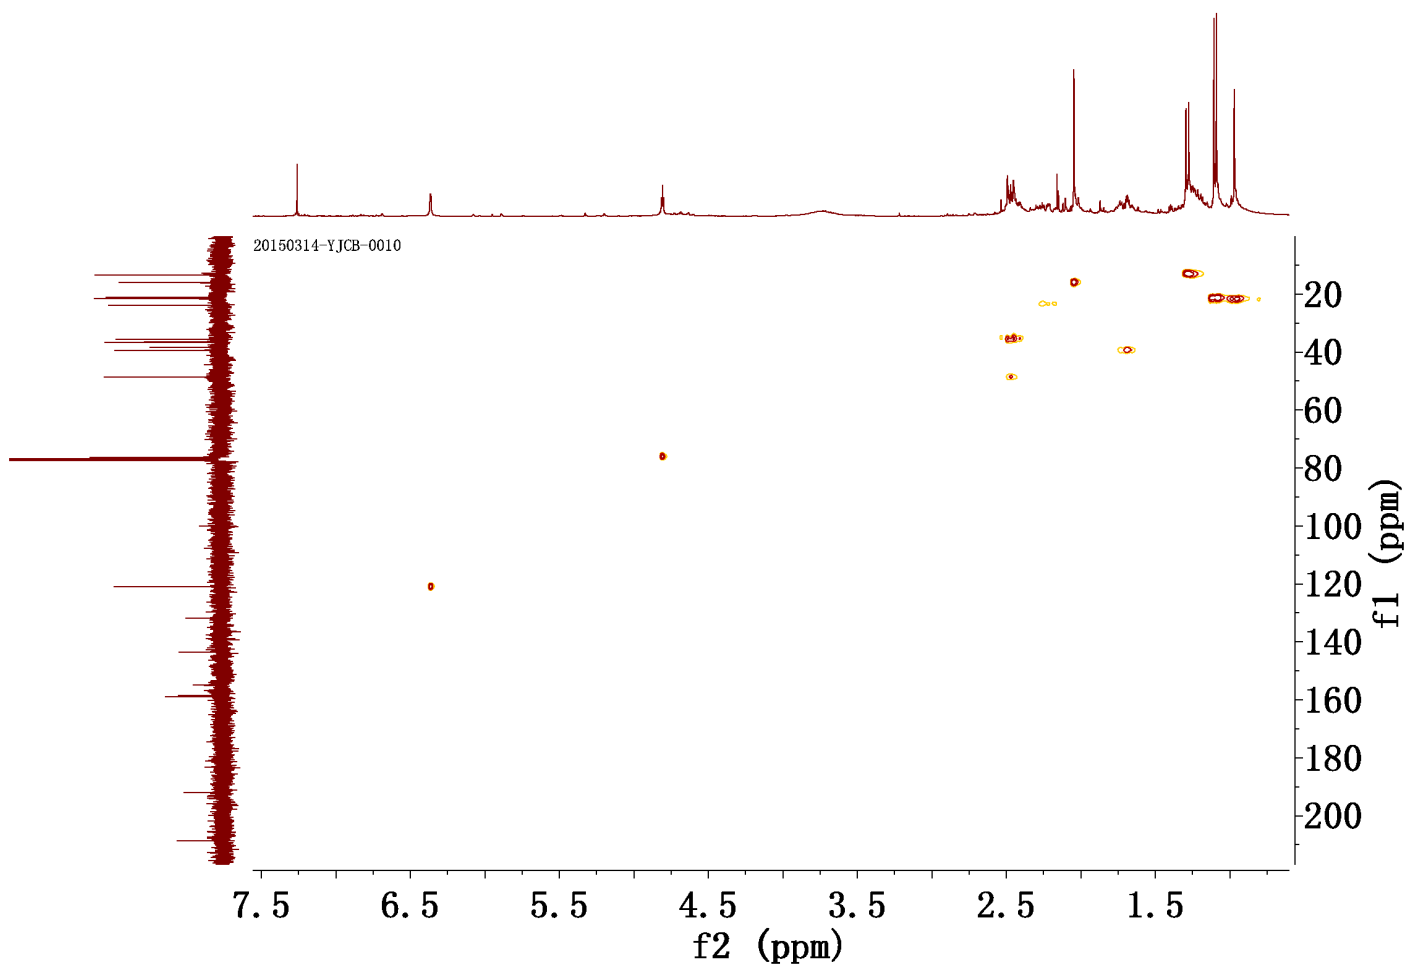

# S16. HRESIMS spectrum of 1

Formula Predictor Report - 1yfcbb-0010.lcd

Page 1 of 1

Data File: F:\伊能\1yfcbb-0010.lcd

| Elmt | Val | Min | Max | Elmt | Val | Min | Max | Elmt | Val | Min | Max | Use Adduct |
|------|-----|-----|-----|------|-----|-----|-----|------|-----|-----|-----|------------|
| H    | 1   | 1   | 30  | O    | 2   | 3   | 3   | Cl   | 1   | 0   | 0   |            |
| B    | 3   | 0   | 0   | F    | 1   | 0   | 0   | Cu   | 2   | 0   | 0   |            |
| C    | 4   | 10  | 30  | P    | 3   | 0   | 0   | Zn   | 2   | 0   | 0   |            |
| N    | 3   | 0   | 0   | S    | 2   | 0   | 0   | Se   | 2   | 0   | 0   |            |

Error Margin (mDa): 50.0  
 HC Ratio: unlimited  
 Max Isotopes: all  
 MSn Iso RI (%): 75.00

DBE Range: -2.0 - 1000.0  
 Apply N Rules: yes  
 Isotope RI (%): 100  
 MSn Logic Mode: AND

Electron Ions: both  
 Use MSn Info: yes  
 Isotope Res: 10000  
 Max Results: 800

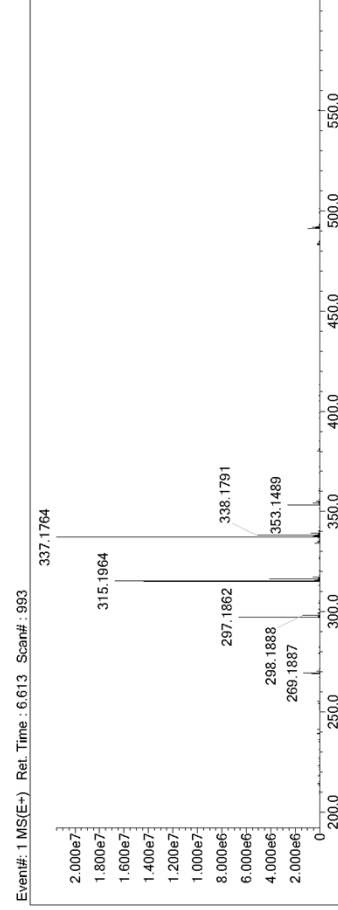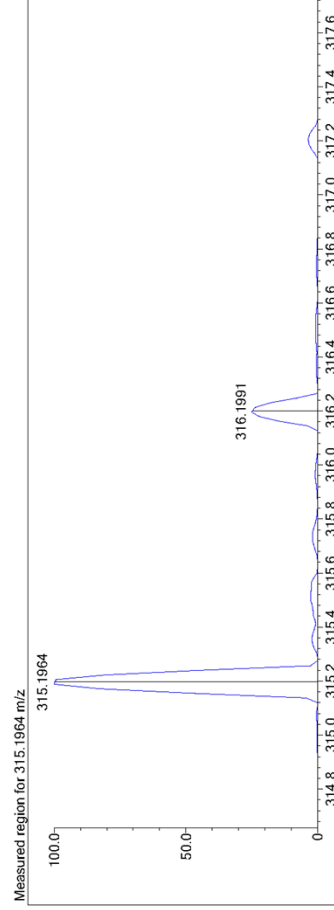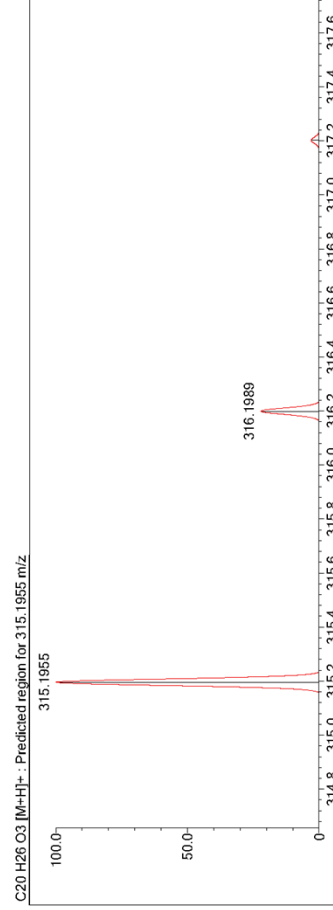

| Rank | Score | Formula (M) | Ion    | Meas. m/z | Pred. m/z | Df. (mDa) | Df. (ppm) | Iso   | DBE |
|------|-------|-------------|--------|-----------|-----------|-----------|-----------|-------|-----|
| 1    | 82.95 | C20 H26 O3  | [M+H]+ | 315.1964  | 315.1955  | 0.9       | 2.86      | 87.00 | 8.0 |



### S17. IR spectrum of 1

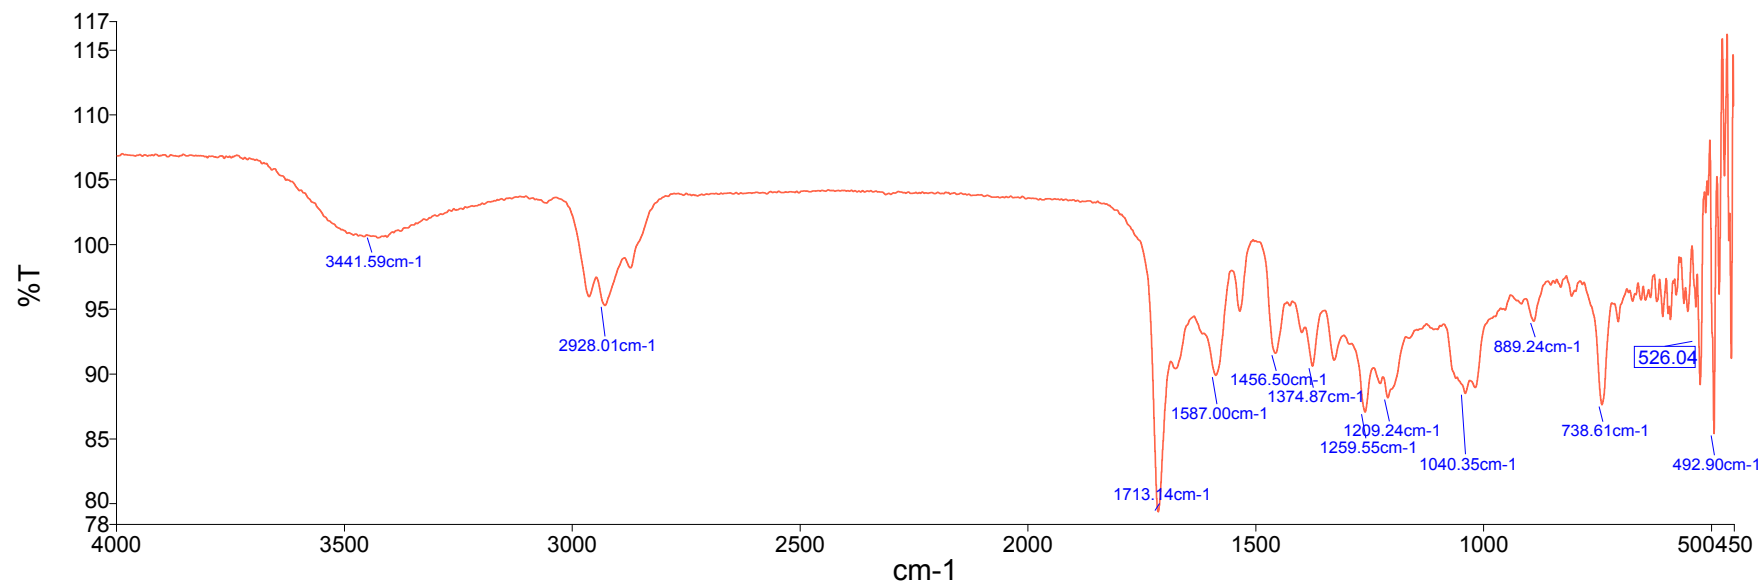

S18.  $^1\text{H}$  NMR spectrum of 2 in Pyridine- $d_5$

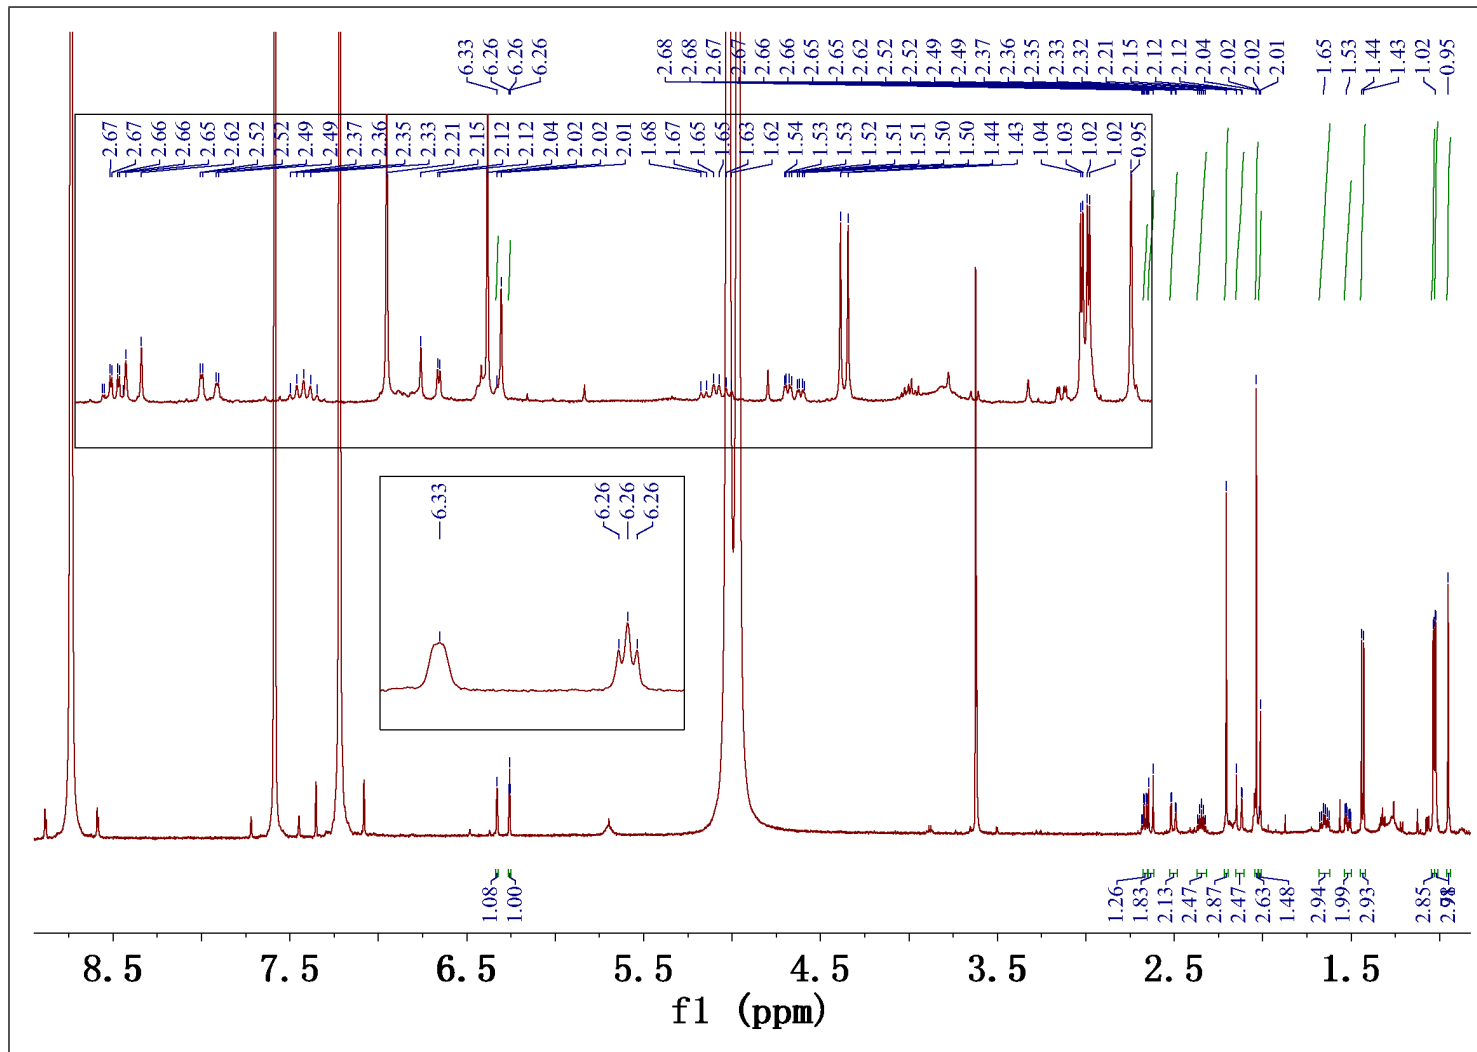

S19. HSQC spectrum of 2 in Pyridine-*d*<sub>5</sub>

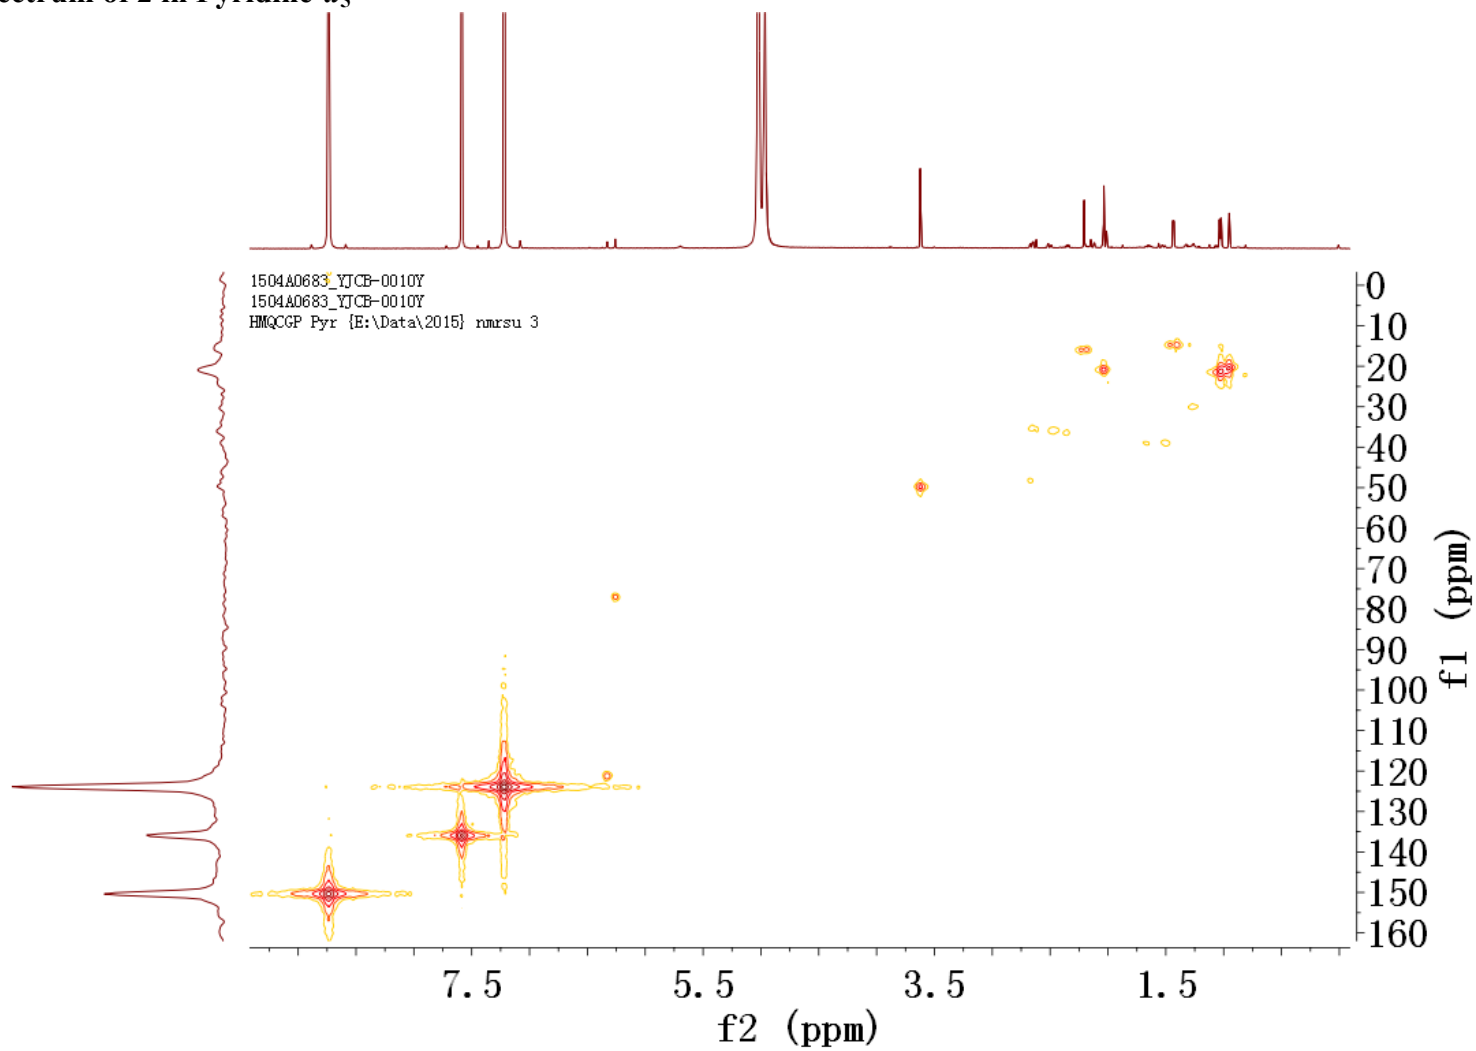

S20. HMBC spectrum of 2 in Pyridine- $d_5$

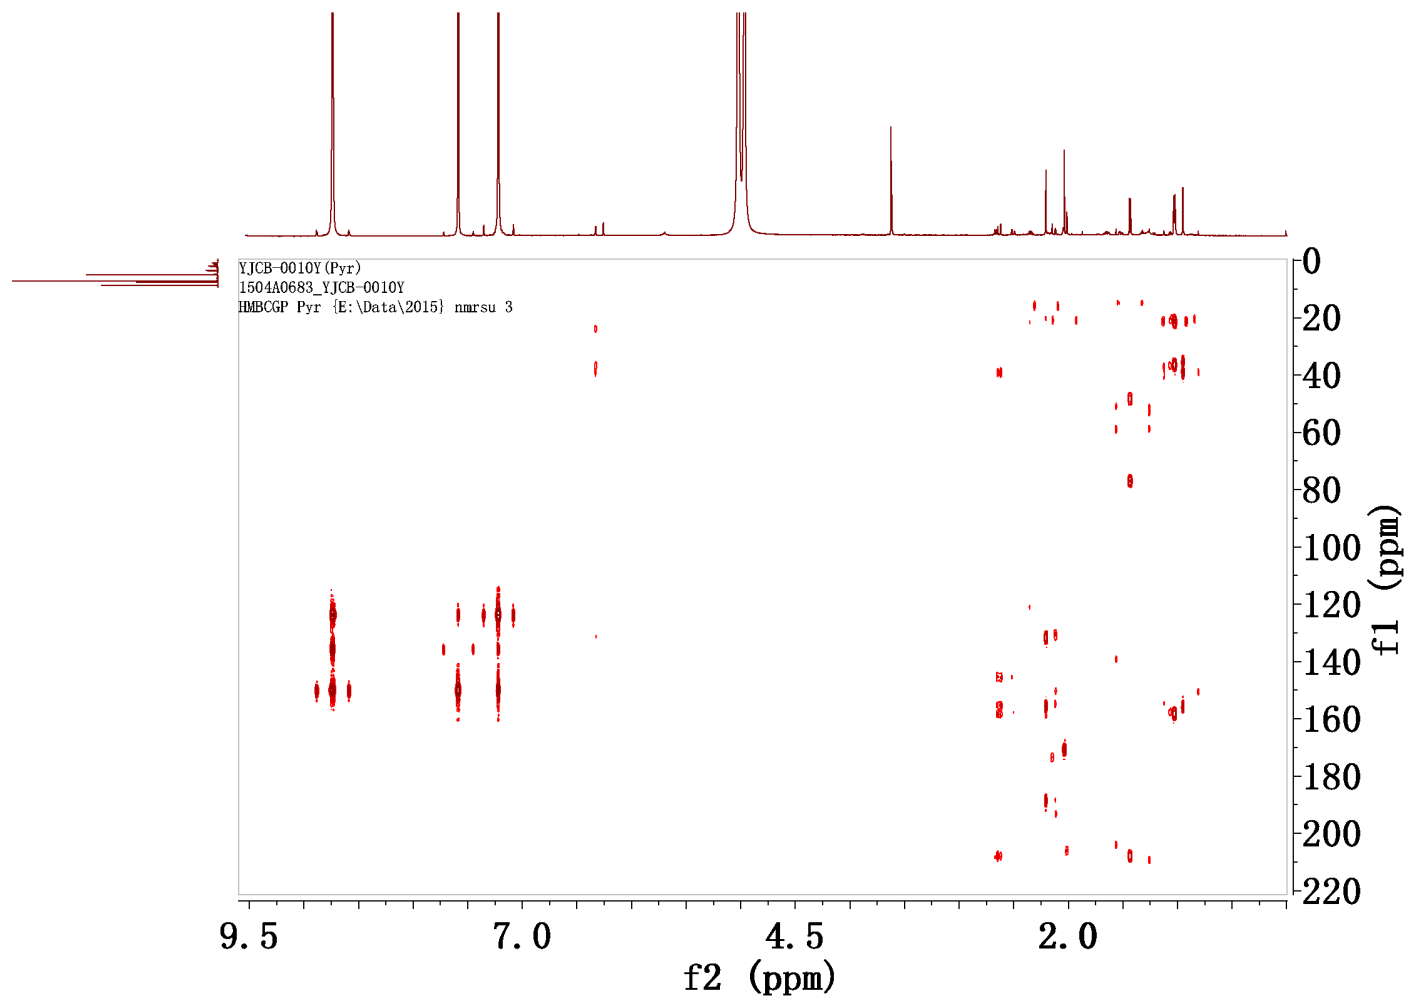

# S21. HRESIMS spectrum of 2

Formula Predictor Report - YJCB-00101Y.pdf.tcd

Page 1 of 1

Data File: F:\伊雅\YJCB-00101Y.pdf.tcd

| Elmt | Val | Min | Max | Elmt | Val | Min | Max | Elmt | Val | Min | Max | Use Adduct |
|------|-----|-----|-----|------|-----|-----|-----|------|-----|-----|-----|------------|
| H    | 1   | 0   | 38  | O    | 2   | 0   | 4   | S    | 2   | 0   | 0   | H          |
| B    | 3   | 0   | 0   | F    | 1   | 0   | 0   | Cl   | 1   | 0   | 0   |            |
| C    | 4   | 0   | 35  | Si   | 4   | 0   | 0   | Cu   | 2   | 0   | 0   |            |
| N    | 3   | 0   | 0   | P    | 3   | 0   | 0   | Zn   | 2   | 0   | 0   |            |

Error Margin (mDa): 50.0  
 HC Ratio: unlimited  
 Max Isotopes: all  
 MSn Iso RI (%): 75.00

DBE Range: -2.0 - 1000.0  
 Apply N Rule: yes  
 Isotope RI (%): 1.00  
 MSn Logic Mode: AND

Electron Ions: both  
 Use MSn Inro: yes  
 Isotope Res: 10000  
 Max Results: 800

Event#: 1 MS(E+) Ret. Time: 0.573 Scan#: 87

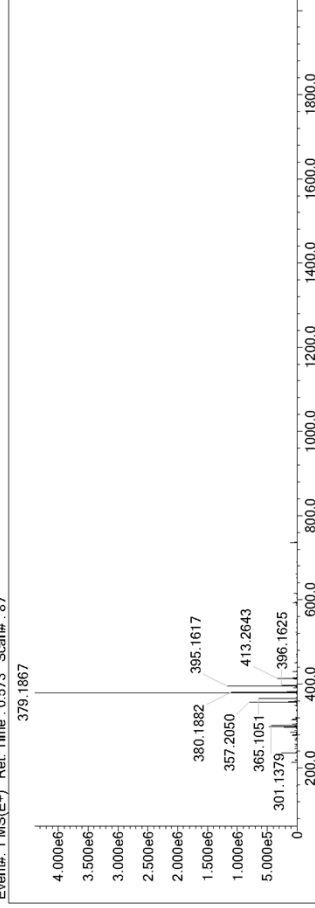

Measured region for 357.2050 m/z

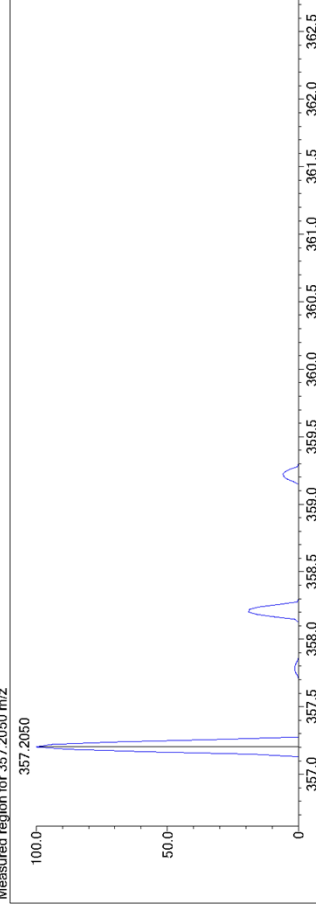

C22 H28 O4 [M+H]+: Predicted region for 357.2060 m/z

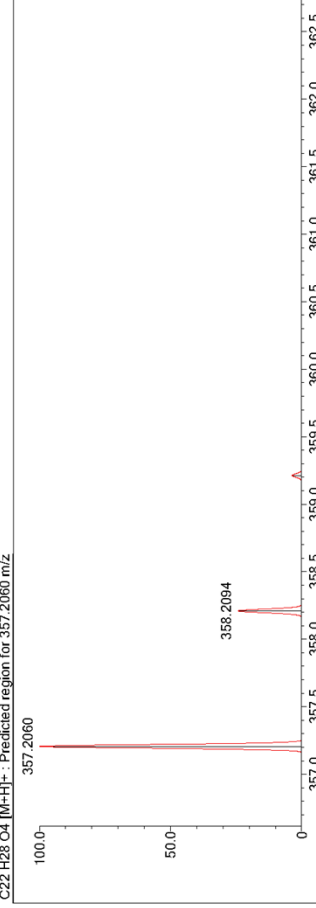

| Rank | Score | Formula (M) | Ion    | Meas. m/z | Pred. m/z | Df. (mDa) | Iso   | DBE   |
|------|-------|-------------|--------|-----------|-----------|-----------|-------|-------|
| 1    | 63.86 | C22 H28 O4  | [M+H]+ | 357.2050  | 357.2060  | -1.0      | -2.80 | 66.87 |
|      |       |             |        |           |           |           |       | 9.0   |

## S22. IR spectrum of 2

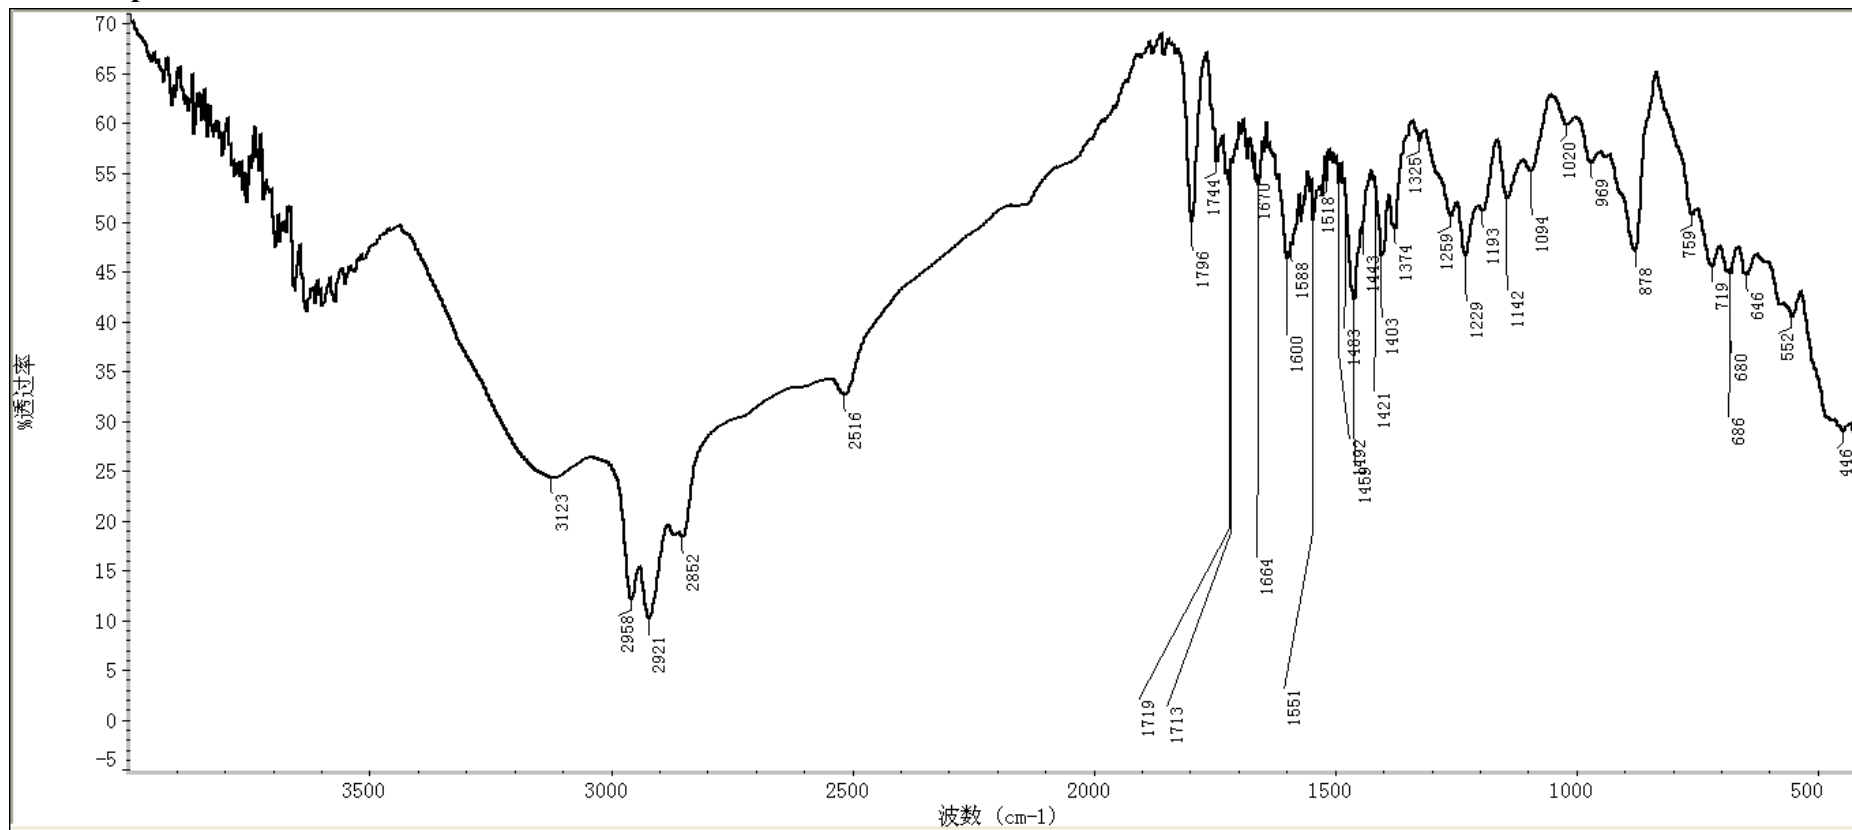

### S23. The quantum chemical calculations

#### ECD simulation:

ECD spectrum of each conformation is simulated according to the overlapping Gaussian functions expressed as:

$$\Delta\varepsilon(E) = \frac{1}{2.296 \times 10^{-39} \sqrt{\pi} \sigma} \sum_i^A \Delta E_i R_i e^{[-(E - \Delta E_i)^2 / \sigma^2]}$$

Where  $\sigma$  is half the bandwidth at 1/e peak height and expressed in energy units. The parameters  $\Delta E_i$  and  $R_i$  are the excitation energies and rotational strengths for the transition  $i$ , respectively.

The above function is converted to  $\Delta\varepsilon, \lambda$  (wavelength) correlations as:

$$\Delta\varepsilon(\lambda) = \frac{1}{2.296 \times 10^{-39} \sqrt{\pi} \sigma} \sum_i^A \Delta E_i R_i e^{[-(1240/\lambda - \Delta E_i)^2 / \sigma^2]}$$

and then simulation were accomplished by using the Excel 2003 and the Origin 7.0 software.

To get the final spectra, all the simulated spectra of conformations of each compound were averaged according to their energy and the Boltzmann distribution theory expressed as:

$$\frac{N_i^*}{N} = \frac{g_i e^{-\varepsilon_i / k_B T}}{\sum g_i e^{-\varepsilon_i / k_B T}}$$

**Table S2.** Energy analysis

| conf.      | Gibbs free energy (298.15 K) |                       |                        |
|------------|------------------------------|-----------------------|------------------------|
|            | G (Hartree)                  | $\Delta G$ (Kcal/mol) | Boltzmann Distribution |
| <b>aC1</b> | -1003.379779                 | 0                     | 0.760                  |
| <b>aC2</b> | -1003.378691                 | 0.68273088            | 0.240                  |
| <b>bC1</b> | -1003.38314                  | 0                     | 0.759                  |
| <b>bC2</b> | -1003.382056                 | 0.68022084            | 0.241                  |

**Table S3.** Specific Optical Rotation

| Conf.      | Calc.  | averaged | experimental |
|------------|--------|----------|--------------|
| <b>aC1</b> | 217.02 | 197.6    | 269          |
| <b>aC2</b> | 136.08 |          |              |
| <b>bC1</b> | 421.80 | 412.6    |              |
| <b>bC2</b> | 383.71 |          |              |



**Table S4.** ECD Data

| Stat | aC1                     |                     | aC2                     |                     |
|------|-------------------------|---------------------|-------------------------|---------------------|
|      | Excitation energies(eV) | Rotatory Strengths* | Excitation energies(eV) | Rotatory Strengths* |
| 1    | 2.7879                  | 13.3854             | 2.7848                  | 12.5387             |
| 2    | 3.0326                  | 3.9141              | 3.0344                  | 4.0341              |
| 3    | 3.5135                  | -2.821              | 3.5163                  | -2.8246             |
| 4    | 4.0735                  | -1.3772             | 4.0768                  | -1.169              |
| 5    | 4.2311                  | 13.5008             | 4.2307                  | 13.9938             |

\* R(velocity) 10\*\*<sup>-40</sup> erg-esu-cm

| Stat | bC1                     |                     | bC2                     |                     |
|------|-------------------------|---------------------|-------------------------|---------------------|
|      | Excitation energies(eV) | Rotatory Strengths* | Excitation energies(eV) | Rotatory Strengths* |
| 1    | 2.9324                  | 21.3181             | 2.9253                  | 26.2332             |
| 2    | 3.03                    | -16.1694            | 3.0303                  | -15.5859            |
| 3    | 3.4931                  | 3.0784              | 3.4926                  | 3.6438              |
| 4    | 4.0215                  | -4.1507             | 4.0238                  | -4.1525             |

\* R(velocity) 10\*\*<sup>-40</sup> erg-esu-cm

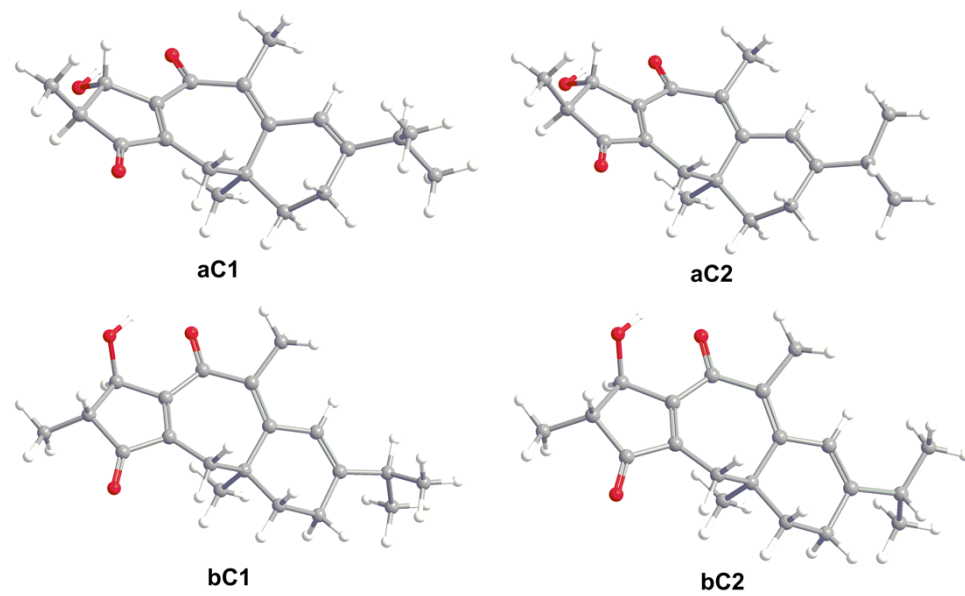

**Fig. S2** B3LYP/6-311++G(2d,2p) optimized lowest energy 3D conformers of **1a** and **1b**.

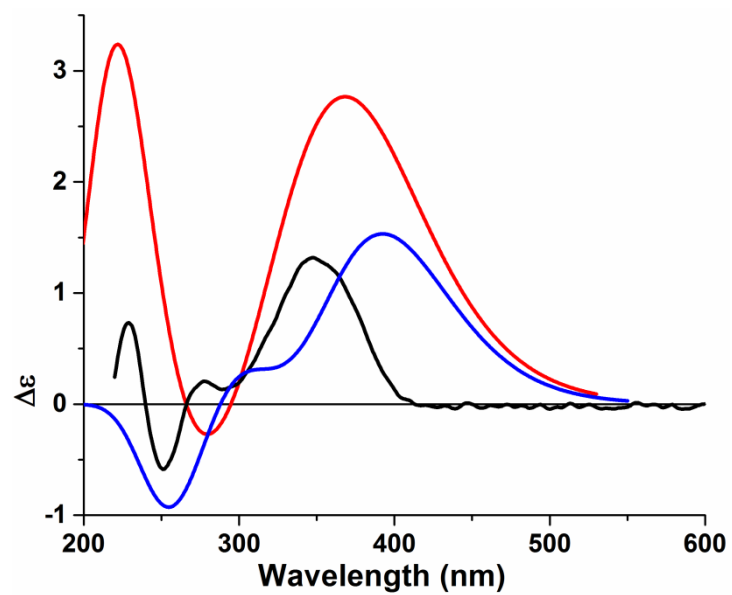

**Fig. S3** Experimental (black line) and B3LYP-SCRF(PCM, acetonitrile)/aug-cc-pVDZ //B3LYP/6-311++G(2d,2p) calculated ( $\sigma = 0.4$  eV) ECD spectra of **1a** (red line) and **1b** (blue line).
